# Supplementary material
Source: publisher figshare collection journal article supplement (https://acs.figshare.com/ndownloader/files/4463749)
Supplement: Supplementary file 1 [file 4463749]

## SUPPORTING INFORMATION FOR

### **Distributional Effects of Climate Change Taxation: The case of the UK**

Kuishuang Feng, Klaus Hubacek\*, Dabo Guan, Monica Contestabile, Jan Minx, John Barrett

\*Corresponding author: Tel: +44 (0) 1133431631 Email: k.hubacek@leeds.ac.uk

### **Contents**

|                                                                                                                                     |                       |
|-------------------------------------------------------------------------------------------------------------------------------------|-----------------------|
| Supplementary Methods.....                                                                                                          | S3                    |
| The Input-output Model.....                                                                                                         | S3                    |
| The Environmental Input-output Model .....                                                                                          | S4                    |
| Supplementary Data.....                                                                                                             | S5                    |
| MOSAIC Database.....                                                                                                                | S5                    |
| Supplementary Figures.....                                                                                                          | S7                    |
| Figure S1: Steps to measure CO <sub>2</sub> and GHGs tax payments.....                                                              | S7                    |
| Figure S2: Tax rates result from intersection of marginal abatement cost curves and the UK emission reduction targets by 2020 ..... | S8                    |
| Supplementary Tables.....                                                                                                           | S9                    |
| Table S1: Top ten consumption products with the highest price changes after CO <sub>2</sub> and GHG taxation.....                   | S9                    |
| Table S2: Price changes of consumption categories after CO <sub>2</sub> and GHG taxation .....                                      | S11                   |
| Table S3: Ten aggregate consumption categories.....                                                                                 | S12                   |
| Table S4: Description of MOSAIC groups [4] .....                                                                                    | S16                   |
| References .....                                                                                                                    | S16 <a href="#">4</a> |



# Supplementary Methods

## The Input-output Model

Input-output analysis is an analytical framework developed by Professor Wassily Leontief in the late 1930s[1], work for which he received the Nobel Prize in Economic Science in 1973. The fundamental purpose of the input-output framework is to analyse the interdependence of industries in an economy [2]. The mathematical structure of an input-output system consists of  $n$  linear equations as shown in Equation 1. The equation depicts that the production of an economy depends on intersectoral relations and final demand.

$$\begin{aligned} x_1 &= x_{11} + x_{12} + \dots + x_{1n} + y_1 \\ x_2 &= x_{21} + x_{22} + \dots + x_{2n} + y_2 \\ &\vdots \\ x_n &= x_{n1} + x_{n2} + \dots + x_{nn} + y_n \end{aligned} \quad (1)$$

The equation 1 can be rewritten as:

$$x_i = \sum_{j=1}^n a_{ij} x_j + y_i \quad (2)$$

Where  $n$  is the number of economic sectors of an economy; the  $x_i$  represents the total economic output of  $i$ th sector;  $y_i$  is the final demand of sector  $i$ .  $x_{ij}$  represents the monetary flows from  $i$ th sector to  $j$ th sector. Technical coefficient  $a_{ij}$  defined by dividing the inter-sectoral flows from  $i$  to  $j$  ( $x_{ij}$ ) with total output of  $j$  ( $x_j$ ),

$$a_{ij} = x_{ij} / x_j \quad (3)$$

Therefore, Equation (2) can be rewritten so as to include the technical coefficient ( $a_{ij}$ ), the developed equation is:

$$x_i = \sum_{j=1}^n a_{ij} x_j + y_i \quad (4)$$

In matrix notation and for the economy as a whole, the Eq (4) can be shown in matrix notation as:

$$X = AX + Y \quad (5)$$

where  $A$  is the coefficient matrix.

To solve for  $x$ , we get total output flowed to final demand

$$X = (I - A)^{-1}Y \quad (6)$$

Where  $(I-A)^{-1}$  is known as the Leontief inverse matrix, which shows the total production of each sector required to satisfy the final demand in the economy [2].

## The Environmental Input-output Model

Environmental input-output analysis (IOA)[2-3], now a well-developed and established method in life cycle assessment and energy analysis, determines the economy-wide environmental repercussions stemming from the purchase,  $y$ , of an individual product or service,

$$f = F(I - A)^{-1}y \quad (7)$$

where  $(I - A)^{-1}$  is known as the Leontief inverse matrix, which shows the total production of each sector required to satisfy a particular final demand in the economy;  $f$  is a vector with each element representing the emissions instigated from the purchase of  $y$ ,  $F$  is a matrix with the rows representing the emission intensities of each pollutant in each economic sector,  $I$  is the identity matrix,  $A$  is a matrix showing the monetary relationship between different sectors in the economy (the technology), and  $y$  is a vector of the final demand purchases from each sector<sup>1</sup>. We used only the final demand from UK domestic production (excluded imports) as the taxes are only levied on UK domestic industry and products.

---

<sup>1</sup> For clarity, in this paper, matrices are indicated by capital letters; vectors by small letters; and scalars by lower case letters.

# Supplementary Data

## MOSAIC Database

Marginal cost curve estimates are taken from the Climate Change Committee [4] to impute emission reductions for different sectors. Data on greenhouse gas emissions of industry sectors are published by the UK Office for National Statistics [5]. Input-output tables for the UK economy are provided by the Stockholm Environment Institute, York [6]. Consumer expenditures per income group are taken from the Family Expenditure Survey [7], and expenditures per lifestyle group are from the MOSAIC database [8]. MOSAIC is a commercial geo-demographic market segmentation system, which classifies all consumers in the UK according to 11 neighborhood groups and 61 neighborhood types (full description in Table S4), which can be interpreted as lifestyles (see [9]).

MOSAIC is a commercial geo-demographic market segmentation system, which classifies all consumers in the UK according to 11 neighborhood groups and 61 neighborhood types (full description in Table S4), which can be interpreted as lifestyles (see (4)). The MOSAIC lifestyle profiles are mainly based on census data which is augmented with a variety of other data sources including expenditure and income information, electoral roll, Experian lifestyle survey information, and consumer credit activities, alongside the post office address file, shareholders register, house prices and council tax information, and ONS local area statistics (see [9]).

The rationale behind using geo-demographic consumption information is that places and people are inextricably linked. Knowledge about the ‘where-about’ of people reveals information about them. Such approaches have proven to work well, because people with similar lifestyles tend to cluster – (see [10]). Geo-demographic lifestyle classifications are built from the bottom-up based on spatially specific variables covering characteristics of both people and places [10]. Hence, the introduction of this type of data does not only allow the extension of the analysis ‘into space’,

but also ultimately the establishment of links between consumption, lifestyles and the physical environment in which activities are taking place.

## Supplementary Figures

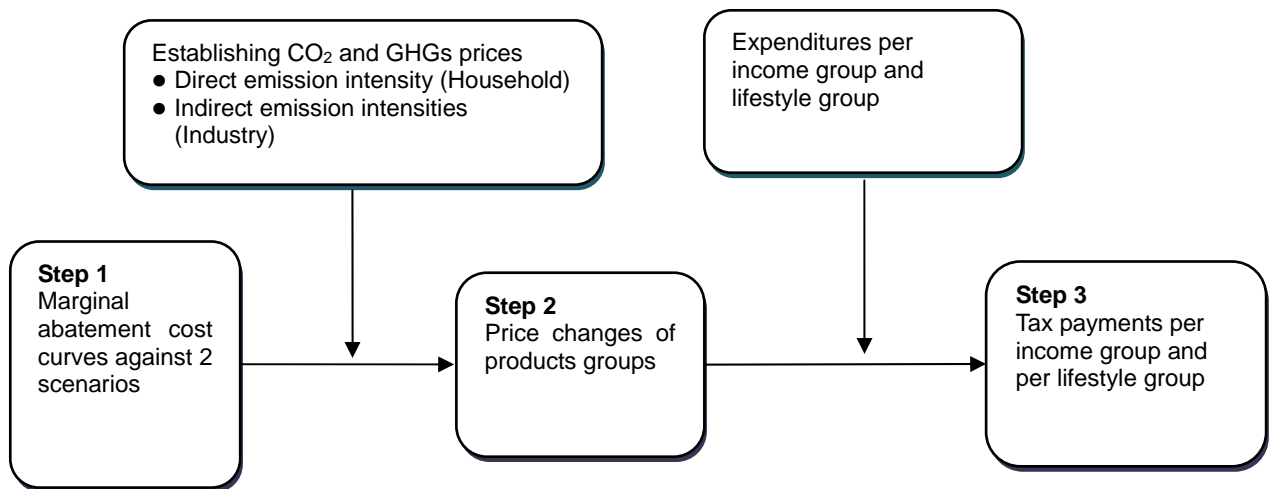

**Figure S1: Steps to measure CO<sub>2</sub> and GHGs tax payments**

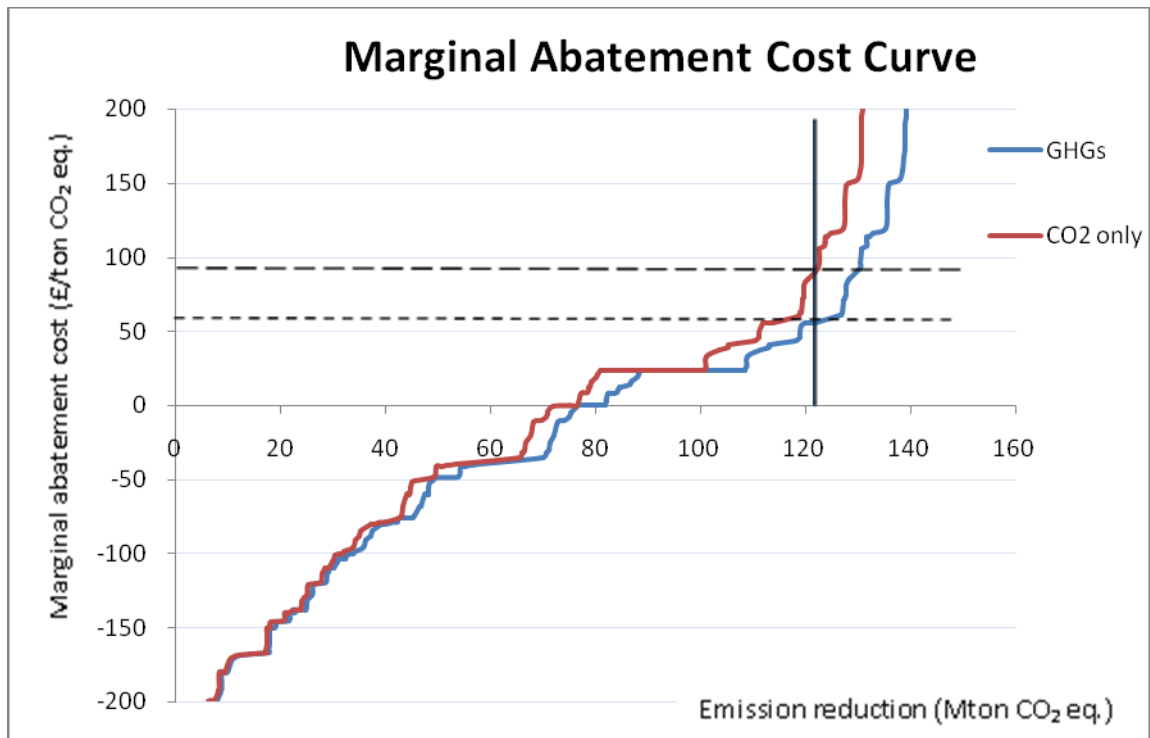

Note: the red line represents the abatement cost of CO<sub>2</sub> emissions and the blue line indicates the abatement cost of GHG emissions. The parts of the curves under the x axis show negative abatement cost or positive net present values (3.5 % discount rate), i.e. over the lifetime of the technology it saves more than it costs.

**Figure S2: Tax rates result from intersection of marginal abatement cost curves and the UK emission reduction targets by 2020**



## Supplementary Tables

| Consumption categories |                                           | CO <sub>2</sub> tax | Consumption categories                    | GHG tax |
|------------------------|-------------------------------------------|---------------------|-------------------------------------------|---------|
| 1                      | GAS & OTHER FUELS                         | 102.8               | GAS & OTHER FUELS                         | 65.3    |
| 2                      | ELECTRICITY                               | 77.3                | ELECTRICITY                               | 48.2    |
| 3                      | OPERATION OF PERSONAL TRANSPORT EQUIPMENT | 18.5                | OPERATION OF PERSONAL TRANSPORT EQUIPMENT | 11.3    |
| 4                      | TRANSPORT SERVICES                        | 13.9                | MEAT EXCL POULTRY                         | 9.0     |
| 5                      | MEAT EXCL POULTRY                         | 4.4                 | TRANSPORT SERVICES                        | 8.6     |
| 6                      | POULTRY MEAT                              | 4.2                 | WATER SUPPLY                              | 7.9     |
| 7                      | WATER SUPPLY                              | 4.0                 | POULTRY MEAT                              | 6.8     |
| 8                      | VEGETABLE AND ANIMAL OILS                 | 4.0                 | FRUIT AND VEG                             | 6.5     |
| 9                      | FRUIT AND VEGETABLE                       | 3.7                 | GRAIN PRODUCTS                            | 5.9     |
| 10                     | GRAIN PRODUCTS                            | 3.7                 | DAIRY PRODUCTS                            | 4.7     |

**Table S1: Top ten consumption products with the highest price changes after CO<sub>2</sub> and GHG taxation.** The GHG tax and CO<sub>2</sub> tax lead to different distributions of the tax burden across consumption categories. The most affected sectors in both categories are ELECTRICITY and GAS & OTHER FUELS with considerable price increases. The high price changes of these two product groups result from their high CO<sub>2</sub> emission intensities. For example, GAS AND OTHER FUELS is the most affected consumption category with a doubling in prices; high levels of CO<sub>2</sub> emissions in this category are caused, for instance, by cooking and heating. The next most affected category is ELECTRICITY where a large amount of CO<sub>2</sub> emissions is created during the production process through burning fossil fuels. The price changes for OPERATION OF PERSONAL TRANSPORT EQUIPMENT and TRANSPORT SERVICES are also large with 18.5 percent and 13.9 percent, respectively, due to combustion of gasoline and associated emissions.

| Consumption categories |                                                  | CO2 tax | GHG tax |
|------------------------|--------------------------------------------------|---------|---------|
| 1                      | MEAT AND MEAT PRODUCTS                           | 4.4     | 9.0     |
| 2                      | POULTRY MEAT AND POULTRY MEAT PRODUCTS           | 4.2     | 6.8     |
| 3                      | FISH                                             | 3.4     | 6.8     |
| 4                      | FRUIT AND VEGETABLE                              | 3.7     | 6.5     |
| 5                      | OILS AND FATS                                    | 4.0     | 5.7     |
| 6                      | DAIRY PRODUCTS                                   | 3.7     | 4.8     |
| 7                      | GRAIN PRODUCTS                                   | 3.7     | 5.9     |
| 8                      | BREAD, RUSKS, BISCUITS ETC                       | 3.4     | 2.6     |
| 9                      | COCOA                                            | 3.0     | 2.1     |
| 10                     | OTHER FOOD PRODUCTS (INCL. SUGAR)                | 3.1     | 2.5     |
| 11                     | NON-ALCOHOLIC BEVERAGES                          | 3.4     | 2.7     |
| 12                     | ALCOHOLIC BEVERAGES                              | 2.2     | 1.6     |
| 13                     | TOBACCO                                          | 2.2     | 1.7     |
| 14                     | CLOTHING                                         | 2.1     | 1.5     |
| 15                     | FOOTWEAR                                         | 2.0     | 1.5     |
| 16                     | ACTUAL RENTALS FOR HOUSING                       | 0.5     | 0.3     |
| 17                     | IMPUTED RENTALS FOR HOUSING                      | 0.5     | 0.3     |
| 18                     | MAINTENANCE AND REPAIR OF THE DWELLING           | 3.6     | 2.3     |
| 19                     | WATER SUPPLY                                     | 4.0     | 7.9     |
| 20                     | ELECTRICITY                                      | 77.3    | 48.2    |
| 21                     | GAS & OTHER FUELS                                | 102.8   | 65.3    |
| 22                     | FURNITURE, FURNISHINGS, CARPETS ETC.             | 2.9     | 2.0     |
| 23                     | HOUSEHOLD TEXTILES                               | 3.1     | 2.1     |
| 24                     | HOUSEHOLD APPLIANCES                             | 2.5     | 1.7     |
| 25                     | GLASSWARE, TABLEWARE & HOUSEHOLD UTENSILS        | 3.4     | 2.3     |
| 26                     | TOOLS AND EQUIPMENT FOR HOUSE & GARDEN           | 3.2     | 2.2     |
| 27                     | GOODS & SERVICES FOR HOUSEHOLD MAINTENANCE       | 1.4     | 0.9     |
| 28                     | MEDICAL PRODUCTS, APPLIANCES & EQUIPMENT         | 2.2     | 1.5     |
| 29                     | OUT-PATIENT SERVICES                             | 1.6     | 1.1     |
| 30                     | HOSPITAL SERVICES                                | 1.5     | 1.0     |
| 31                     | PURCHASE OF VEHICLES                             | 3.2     | 2.0     |
| 32                     | OPERATION OF PERSONAL TRANSPORT EQUIPMENT        | 18.5    | 11.3    |
| 33                     | TRANSPORT SERVICES                               | 13.9    | 8.6     |
| 34                     | POSTAL SERVICES                                  | 2.6     | 1.7     |
| 35                     | TELEPHONE & TELE FAX EQUIPMENT                   | 2.1     | 1.5     |
| 36                     | TELEPHONE & TELE FAX SERVICES                    | 1.5     | 1.0     |
| 37                     | AUDIO-VISUAL, PHOTO & INFO. PROCESSING EQUIPMENT | 2.3     | 1.6     |
| 38                     | OTHER MAJOR DURABLES FOR RECREATION & CULTURE    | 3.0     | 2.4     |
| 39                     | OTHER RECREATIONAL EQUIPMENT ETC.                | 2.8     | 3.8     |
| 40                     | RECREATIONAL & CULTURAL SERVICES                 | 1.4     | 1.0     |
| 41                     | NEWSPAPERS, BOOKS & STATIONERY                   | 2.8     | 1.9     |
| 42                     | EDUCATION                                        | 1.6     | 1.1     |

|    |                        |     |     |
|----|------------------------|-----|-----|
| 43 | CATERING SERVICES      | 2.4 | 1.9 |
| 44 | ACCOMMODATION SERVICES | 2.4 | 1.9 |
| 45 | PERSONAL CARE          | 2.5 | 1.7 |
| 46 | PERSONAL EFFECTS NEC   | 2.6 | 1.8 |
| 47 | SOCIAL PROTECTION      | 1.6 | 1.1 |
| 48 | INSURANCE              | 2.0 | 1.3 |
| 49 | FINANCIAL SERVICES NEC | 1.0 | 0.6 |
| 50 | OTHER SERVICES NEC     | 1.6 | 1.2 |

**Table S2: Price changes of consumption categories after CO<sub>2</sub> and GHG taxation**

|                       |                                                                                                                                                                                                                                                                                                                                                                                       |
|-----------------------|---------------------------------------------------------------------------------------------------------------------------------------------------------------------------------------------------------------------------------------------------------------------------------------------------------------------------------------------------------------------------------------|
| FOOD AND DRINKS       | MEAT AND MEAT PRODUCTS<br>POULTRY MEAT AND POULTRY MEAT PRODUCTS<br>FISH<br>FRUIT AND VEGETABLE<br>OILS AND FATS<br>DAIRY PRODUCTS<br>BREAD, RUSKS, BISCUITS ETC<br>COCOA<br>OTHER FOOD PRODUCTS (INCL. SUGAR)<br>NON-ALCOHOLIC BEVERAGES<br>ALCOHOLIC BEVERAGES<br>TOBACCO                                                                                                           |
| CLOTHING AND FOOTWEAR | CLOTHING<br>FOOTWEAR                                                                                                                                                                                                                                                                                                                                                                  |
| HOUSING               | ACTUAL RENTALS FOR HOUSING<br>IMPUTED RENTALS FOR HOUSING<br>MAINTENANCE AND REPAIR OF THE DWELLING<br>WATER SUPPLY<br>ELECTRICITY<br>GAS & OTHER FUELS<br>FURNITURE, FURNISHINGS, CARPETS ETC.<br>HOUSEHOLD TEXTILES<br>HOUSEHOLD APPLIANCES<br>GLASSWARE, TABLEWARE & HOUSEHOLD UTENSILS<br>TOOLS AND EQUIPMENT FOR HOUSE & GARDEN<br>GOODS & SERVICES FOR HOUSEHOLD<br>MAINTENANCE |
| HEALTH                | MEDICAL PRODUCTS, APPLIANCES & EQUIPMENT<br>OUT-PATIENT SERVICES<br>HOSPITAL SERVICES                                                                                                                                                                                                                                                                                                 |
| TRANSPORT             | PURCHASE OF VEHICLES<br>OPERATION OF PERSONAL TRANSPORT EQUIPMENT                                                                                                                                                                                                                                                                                                                     |

|                     |                                                                                                                         |
|---------------------|-------------------------------------------------------------------------------------------------------------------------|
|                     | TRANSPORT SERVICES                                                                                                      |
| COMMUNICATION       | POSTAL SERVICES<br>TELEPHONE & TELE FAX EQUIPMENT<br>TELEPHONE & TELE FAX SERVICES                                      |
| RECREATION&CULTURE  | RECREATIONAL & CULTURAL SERVICES<br>NEWSPAPERS, BOOKS & STATIONERY                                                      |
| EDUCATION           | EDUCATION                                                                                                               |
| RESTAURANTS&HOTELS  | CATERING SERVICES<br>ACCOMMODATION SERVICES                                                                             |
| MISC GOODS&SERVICES | PERSONAL CARE<br>PERSONAL EFFECTS NEC<br>SOCIAL PROTECTION<br>INSURANCE<br>FINANCIAL SERVICES NEC<br>OTHER SERVICES NEC |

**Table S3: Ten aggregate consumption categories**

| Group | Group Description                                                                                                                                                                                                                                                                                                                                                                                                                                  | % Household | Type | Type Description     | % Household |
|-------|----------------------------------------------------------------------------------------------------------------------------------------------------------------------------------------------------------------------------------------------------------------------------------------------------------------------------------------------------------------------------------------------------------------------------------------------------|-------------|------|----------------------|-------------|
| A     | <p>Symbols of Success:</p> <p><i>Symbols of Success</i> contains people whose lives are 'successful' by whatever yardsticks society commonly uses to measure success. These are people who have rewarding careers rather than jobs, who live in sought after locations, who drive the more modern and expensive cars and who indulge in the most exotic leisure pursuits. Most, though not all, appear to enjoy stable household arrangements.</p> | 9.62        | A01  | Global Connections   | 0.72        |
|       |                                                                                                                                                                                                                                                                                                                                                                                                                                                    |             | A02  | Cultural leadership  | 0.92        |
|       |                                                                                                                                                                                                                                                                                                                                                                                                                                                    |             | A03  | Corporate Chieftains | 1.12        |
|       |                                                                                                                                                                                                                                                                                                                                                                                                                                                    |             | A04  | Golden Empty Nesters | 1.33        |
|       |                                                                                                                                                                                                                                                                                                                                                                                                                                                    |             | A05  | Provincial Privilege | 1.66        |
|       |                                                                                                                                                                                                                                                                                                                                                                                                                                                    |             | A06  | High Technologists   | 1.82        |
|       |                                                                                                                                                                                                                                                                                                                                                                                                                                                    |             | A07  | Semi-Rural Seclusion | 2.04        |
| B     | <p>Happy Families:</p> <p><i>Happy Families</i> contains people whose focus is on career, home and family. These are mostly younger age groups who are married, or at least in a permanent relationship, and are now raising children in post war family houses, often in</p>                                                                                                                                                                      | 10.76       | B08  | Just Moving in       | 0.91        |
|       |                                                                                                                                                                                                                                                                                                                                                                                                                                                    |             | B09  | Fledgling Nurseries  | 1.18        |
|       |                                                                                                                                                                                                                                                                                                                                                                                                                                                    |             | B10  | Upscale New Owners   | 1.35        |
|       |                                                                                                                                                                                                                                                                                                                                                                                                                                                    |             | B11  | Families Making Good | 2.32        |
|       |                                                                                                                                                                                                                                                                                                                                                                                                                                                    |             | B12  | Middle Rung Families | 2.86        |
|       |                                                                                                                                                                                                                                                                                                                                                                                                                                                    |             | B13  | Burdened Optimists   | 1.96        |

|   |                                                                                                                                                                                                                                                                                                                                                                                                                                                                      |       |                                               |                                                                                                                                                      |                                                      |
|---|----------------------------------------------------------------------------------------------------------------------------------------------------------------------------------------------------------------------------------------------------------------------------------------------------------------------------------------------------------------------------------------------------------------------------------------------------------------------|-------|-----------------------------------------------|------------------------------------------------------------------------------------------------------------------------------------------------------|------------------------------------------------------|
|   | areas of the country with rapidly growing populations. The focus of expenditure is on equipment for the home and garden, and the immediate family unit is the principal focus of leisure activities.                                                                                                                                                                                                                                                                 |       | B14                                           | In Military Quarters                                                                                                                                 | 0.17                                                 |
| C | <p>Suburban Comfort:</p> <p><i>Suburban Comfort</i> comprises people who have successfully established themselves and their families in comfortable homes in mature suburbs. Children are becoming more independent, work is becoming less of a challenge and interest payments on homes and other loans are becoming less burdensome. With more time and money on their hands, people can relax and focus on activities that they find intrinsically rewarding.</p> | 15.10 | C15<br>C16<br>C17<br>C18<br>C19<br>C20        | Close to Retirement<br>Conservative Values<br>Small Time Business<br>Sprawling Subtopia<br>Original Suburbs<br>Asian Enterprise                      | 2.81<br>2.84<br>2.93<br>3.08<br>2.41<br>1.02         |
| D | <p>Ties of Community:</p> <p><i>Ties of Community</i> is comprised of people whose lives are mostly played out within the confines of close knit communities. Living mostly in older houses in inner city neighbourhoods or in small industrial towns, most of these people own their homes, drive their own cars and hold down responsible jobs. Community norms rather than individual material ambitions shape the pattern of most residents' consumption.</p>    | 16.04 | D21<br>D22<br>D23<br>D24<br>D25<br>D26<br>D27 | Respectable Rows<br>Affluent Blue Collar<br>Industrial Grit<br>Coronation Street<br>Town Centre Refuge<br>South Asian Industry<br>Settled Minorities | 2.65<br>3.12<br>3.82<br>2.81<br>1.13<br>0.88<br>1.62 |
| E | <p>Urban Intelligence:</p> <p><i>Urban Intelligence</i> mostly contains young and well educated people who are open to new ideas and influences. Young and single, and few encumbered with children, these people tend to be avid explorers of new ideas and</p>                                                                                                                                                                                                     | 7.19  | E28<br>E29<br>E30<br>E31<br>E32<br>E33        | Counter Cultural Mix<br>City Adventurers<br>New Urban Colonists<br>Caring Professionals<br>Dinky Developments<br>Town Gown Transition                | 1.36<br>1.27<br>1.36<br>1.08<br>1.10<br>0.76         |

|   |                                                                                                                                                                                                                                                                                                                                                                                                                                                                                                                                                                                 |       |                                        |                                                                                                                                         |                                              |
|---|---------------------------------------------------------------------------------------------------------------------------------------------------------------------------------------------------------------------------------------------------------------------------------------------------------------------------------------------------------------------------------------------------------------------------------------------------------------------------------------------------------------------------------------------------------------------------------|-------|----------------------------------------|-----------------------------------------------------------------------------------------------------------------------------------------|----------------------------------------------|
|   | fashions, cosmopolitan in their tastes and liberal in their social attitudes. Whilst eager consumers of the media and with a sophisticated understanding of brand values, they like to be treated as individuals, and value authenticity over veneer.                                                                                                                                                                                                                                                                                                                           |       | E34                                    | University Challenge                                                                                                                    | 0.26                                         |
| F | <p>Welfare Borderline:</p> <p><i>Welfare Borderline</i> is comprised of many people who are struggling to achieve the material and personal rewards that are assumed to be open to all in an affluent society. Few hold down rewarding or well paying jobs and, as a result, most rely on the council for their accommodation, on public transport to get around and on state benefits to fund even the bare essentials. The lack of stability in many family formations undermines social networks and leads to high levels of anti social behaviour among local children.</p> | 6.43  | F35<br>F36<br>F37<br>F38<br>F39<br>F40 | Bedsit Beneficiaries<br>Metro Multiculture<br>Upper Floor Families<br>Tower Block Living<br>Dignified Dependency<br>Sharing a Staircase | 0.71<br>1.67<br>1.72<br>0.49<br>1.34<br>0.50 |
| G | <p>Municipal Dependency:</p> <p><i>Municipal Dependency</i> mostly contains families on lower incomes who live on large municipal council estates where few of the tenants have exercised their right to buy. Often isolated in the outer suburbs of large provincial cities, Municipal Dependency is characterised as much by low aspirations as by low incomes. Here people watch a lot of television and buy trusted mainstream brands from shops that focus on price rather than range or service.</p>                                                                      | 6.71  | G41<br>G42<br>G43                      | Families on Benefits<br>Low Horizons<br>Ex-industrial Legacy                                                                            | 1.21<br>2.64<br>2.86                         |
| H | <p>Blue Collar Enterprise:</p> <p><i>Blue Collar Enterprise</i> comprises people who, though not</p>                                                                                                                                                                                                                                                                                                                                                                                                                                                                            | 11.01 | H44<br>H45                             | Rustbelt Resilience<br>Older Right to Buy                                                                                               | 3.00<br>2.67                                 |

|   |                                                                                                                                                                                                                                                                                                                                                                                                                                          |      |                                        |                                                                                                                                 |                                              |
|---|------------------------------------------------------------------------------------------------------------------------------------------------------------------------------------------------------------------------------------------------------------------------------------------------------------------------------------------------------------------------------------------------------------------------------------------|------|----------------------------------------|---------------------------------------------------------------------------------------------------------------------------------|----------------------------------------------|
|   | necessarily very well educated, are practical and enterprising in their orientation. Many of these people live in what were once council estates but where tenants have exercised their right to buy. They own their cars, provide a reliable source of labour to local employers and are streetwise consumers. Tastes are mass market rather than individualistic and focus on providing comfort and value to family members.           |      | H46<br>G47                             | White Van Culture<br>New Town<br>Materialism                                                                                    | 3.17<br>2.17                                 |
| I | Twilight Subsistence:<br><br><i>Twilight Subsistence</i> consists of elderly people who are mostly reliant on state benefits, and live in housing designed by local authorities and housing associations. Some live in old people's homes or sheltered accommodation, while others live in small bungalows, set in small enclaves within larger council estates. Most of these people spend money only on the basic necessities of life. | 3.88 | I48<br>I49<br>I50                      | Old People in Flats<br>Low Income Elderly<br>Cared for Pensioners                                                               | 0.83<br>1.63<br>1.43                         |
| J | Grey Perspectives:<br><br><i>Grey Perspectives</i> consists mostly of pensioners who own their homes and who have some source of income beyond the basic state pension. Many of these people have, on retirement, moved to the seaside or the countryside to live among people similar to themselves. Today many of these people have quite active lifestyles and are considered in their purchasing decisions.                          | 7.88 | J51<br>J52<br>J53<br>J54<br>J55<br>J56 | Sepia Memories<br>Childfree Serenity<br>High Spending Elders<br>Bungalow Retirement<br>Small Town Seniors<br>Tourist Attendants | 0.75<br>1.34<br>1.53<br>1.26<br>2.71<br>0.30 |
| K | Rural Isolation:<br><br><i>Rural Isolation</i> contains people whose pattern of living is distinctively rural. They live not just outside major population centres but also deep in the                                                                                                                                                                                                                                                  | 5.39 | K57<br>K58<br>K59<br>K60               | Summer Playgrounds<br>Greenbelt Guardians<br>Parochial Villagers<br>Pastoral Symphony                                           | 0.29<br>1.74<br>1.64<br>1.31                 |

|  |                                                                                                                                                                                                                                                                                                                                                      |  |     |                     |      |
|--|------------------------------------------------------------------------------------------------------------------------------------------------------------------------------------------------------------------------------------------------------------------------------------------------------------------------------------------------------|--|-----|---------------------|------|
|  | countryside, in small communities which have been little influenced by the influx of urban commuters. These are places where people with different levels of income share attachments to local communities, and where engagement with the community and with the natural environment are more important to most residents than material consumption. |  | K61 | Upland Hill Farmers | 0.41 |
|--|------------------------------------------------------------------------------------------------------------------------------------------------------------------------------------------------------------------------------------------------------------------------------------------------------------------------------------------------------|--|-----|---------------------|------|

**Table S4: Description of MOSAIC groups [9]**

## References

1. Leontief, W., *Input-Output Economics*. Oxford University Press: Oxford, 1986.
2. Miller, R. E.; Blair, P. D., *Input-Output Analysis: Foundations and Extensions*. Prentice-Hall, Inc.: New Jersey, 1985.
3. Lave, L. B.; Cobas-F, I. E.; Hendrickson, C. T.; McM, i. F. C., Using input-output analysis to estimate economy-wide discharges *Environmental Science and Technology* **1995**, 29, 420-426.
4. Committee on Climate Change *Building a low-carbon economy*; Committee on Climate Change: 05 April, 2009.
5. ONS *UK National Accounts - The Blue Book*; Office for National Statistics 2006.
6. Wiedmann, T.; Wood, R.; Lenzen, M.; Minx, J.; Guan, D.; Barrett, J. *Development of an Embedded Carbon Emissions indicator - Producing a Time Series of Input-Output Tables and Embedded Carbon Dioxide Emissions for the UK by Using a MRIO Data Optimisation System*; Stockholm Environment Institute at the University of York and Centre for Integrated Sustainability Analysis at the University of Sydney: Defra, London, UK, June, 2008, 2008.
7. ONS *Family Spending and Family Expenditure Surveys*; Office for National Statistics: 2006.
8. Harris, R.; Sleight, P.; Webber, R., *Geodemographics, GIS and neighbourhood targeting*. John Wiley & Sons: Chichester, 2005.
9. Experian *Mosaic United Kingdom - The consumer classification for the UK*; Mosaic UK: 2008.
10. Baiocchi, G.; Minx, J.; Hubacek, K., The Impact of Social Factors and Consumer Behavior on CO2 emissions in the UK: a Panel Regression Based on Input-Output and Geo-demographic Consumer Segmentation Data. *Journal of Industrial Ecology* **2010**, 14/1, 50-72.
